# Supplementary material for: On the implications of aerosol liquid water and phase separation for organic aerosol mass
Source: Copernicus journal article supplement (doi:10.5194/acp-17-343-2017), 2017-01-06
Supplement: Supplementary file 1 [file acp-17-343-2017-supplement.zip]

Supporting information for:  
On the implications of aerosol liquid water and phase separation for modeled organic aerosol mass

H. O. T. Pye et al.  
pye.havala@epa.gov

Supporting information contains: 12 pages  
6 tables  
3 figures

## OM/OC and O:C Unit Conversions

### *Separation RH*

Separation RH (fraction, 0–1) as a function of molar O:C for ammonium sulfate (NH<sub>4</sub>)<sub>2</sub>SO<sub>4</sub> is (You et al., 2013):

$$SRH = 1/(1 + \exp((O:C - 0.68) / 0.10)) \quad (S1)$$

Neglecting the 5 polymer samples (polypropylene glycol, ethylene glycol containing):

$$OM/OC = 1.3013 \times O:C + 1.1663 \quad (S2)$$

The  $r^2$  for OM/OC vs. O:C in equation S2 is 0.99.

### *Kappa ( $\kappa$ )*

Original Lambe et al. (2011) fit:

$$\kappa_{org} = (0.18 \pm 0.04) \times O:C_{old} + 0.03 \quad (S3)$$

Following Canagaratna et al. (2015), the O:C ratios obtained from AMS instruments are increased 27% to account for a low bias in old calibrations (Canagaratna et al., 2015):

$$O:C = 1.27 \times O:C_{old} \quad (S4)$$

Thus:

$$\kappa_{org} = 0.14 \times O:C + 0.03 \quad (S5)$$

The relationship between kappa and O:C (improved-ambient) are recast in terms of OM/OC (improved-ambient) using the AMS relationship (Canagaratna et al., 2015):

$$OM/OC = 1.29 \times O:C + 1.17 \quad (S6)$$

As a result, Lambe et al. 2011 becomes

$$\kappa_{org} = 0.11 \times OM/OC - 0.10 \quad (S7)$$

For  $\kappa_{org} = 0.37 \times O:C_{old} - 0.09$  (fit based on Jimenez et al. (2009), Raatikainen et al. (2010), and Duplissy et al. (2011)):

$$\kappa_{org} = 0.23 \times OM/OC - 0.35 \quad (S8)$$

### *Other*

When OM/OC needs to be related to O:C and AMS data or a specific molecular structure is not directly involved, we use Simon and Bhawe (2012) equation S1 assuming only H, C, and O atoms:

$$O:C = 12/15(OM/OC) - 14/15 \quad (S9)$$

Equivalently,

$$OM/OC = 1.25 \times O:C + 1.17 \quad (S10)$$

Which results in OM/OC that agree with the improved-ambient AMS relationship (Canagaratna et al., 2015) within 2%.

Table S1: New deposition surrogates

| Species | Henry's Law Coefficient (M/atm) | Diffusivity (cm <sup>2</sup> /s) | Relative reactivity | f0 (meso parameter from Wesely) | Lebas molar volume (cm <sup>3</sup> /mol) |
|---------|---------------------------------|----------------------------------|---------------------|---------------------------------|-------------------------------------------|
| IEPOX   | IEPOX (3x10 <sup>7</sup> )      | 0.0579                           | 8                   | 0                               | 110.8                                     |
| HACET   | HACET (2.93x10 <sup>3</sup> )   | 0.106 (Nguyen et al., 2015)      | 8                   | 0                               | 72.6                                      |

Table S2: Revised deposition species

| Species  | Old dry deposition surrogate | Old wet deposition surrogate                   | New dry deposition surrogate | New wet deposition surrogate                 |
|----------|------------------------------|------------------------------------------------|------------------------------|----------------------------------------------|
| NISOPOOH | H2O2                         | H2O2                                           | NTRM                         | HYDROXY_NITRATES (1.7x10 <sup>4</sup> M/atm) |
| HPALD    | none                         | none                                           | OP                           | hydroxy_peroxide (8.3x10 <sup>4</sup> M/atm) |
| ISOPOOH  | OP                           | HYDROXY_PEROXIDE (H=8.3x10 <sup>4</sup> M/atm) | IEPOX                        | no change                                    |

Table S3: Revised surrogate properties

| Species                           | Property                | Old Value                 | New Value                 | Reference                 |
|-----------------------------------|-------------------------|---------------------------|---------------------------|---------------------------|
| PROPNN                            | Henry's Law Coefficient | 1x10 <sup>3</sup> M/atm   | 1x10 <sup>4</sup> M/atm   | Nguyen et al. (2015)      |
| H2O2                              | Henry's Law             | 8.3x10 <sup>4</sup> M/atm | 1.1x10 <sup>5</sup> M/atm | Sander (1999)             |
| H2O2                              | Relative reactivity     | 30                        | 34,000                    | Nguyen et al. (2015)      |
| HYDROXY_NITRATES, PROPNN, ORG_NTR | f0 (meso parameter)     | 0.1                       | 0                         | Nguyen et al. (2015)      |
| OP                                | f0 (meso parameter)     | 0.1                       | 0.3                       | Wolfe and Thornton (2011) |

Table S4: Observed and modeled organic aerosol concentrations at SOAS CTR. Values used in Figure 1. WSOC is converted to organic aerosol using an OM/OC of 2.1.

| Species          | Model or Observation? | Value [μg/m <sup>3</sup> ] |
|------------------|-----------------------|----------------------------|
| POA              | Observation           | 0.47                       |
| POA              | Model                 | 0.84                       |
| Water soluble OA | Observation           | 1.993x2.1                  |
| Aqueous SOA      | Model                 | 0.362x2.1                  |
| Total OA         | Observation           | 5.44                       |
| Total OA         | Model                 | 3.58                       |

Table S5: Domain-wide deposition (in percent) of semivolatiles by phase (gas, aerosol) and type (dry, wet) for each volatility class and overall. Values used in Figure 5.

|              | C*<0.1<br>μg/m <sup>3</sup> | C*=0.1<br>μg/m <sup>3</sup> | C*=1<br>μg/m <sup>3</sup> | C*=10<br>μg/m <sup>3</sup> | C*=100<br>μg/m <sup>3</sup> | Overall:<br>Base<br>Simulation | Overall:<br>Updated<br>Simulation |
|--------------|-----------------------------|-----------------------------|---------------------------|----------------------------|-----------------------------|--------------------------------|-----------------------------------|
| Dry, Aerosol | 3.7                         | 2.8                         | 1.6                       | 0.2                        | 0.02                        | 0.8                            | 0.8                               |
| Wet, Aerosol | 96.3                        | 63.4                        | 34.5                      | 4.5                        | 0.7                         | 21.6                           | 20.8                              |
| Dry, Gas     | 0                           | 13.5                        | 28.6                      | 43.6                       | 39.1                        | 27.2                           | 32.2                              |
| Wet, Gas     | 0                           | 20.4                        | 35.2                      | 51.7                       | 60.2                        | 50.3                           | 46.2                              |

Table S6: *A posteriori* properties at 298K used in  $\gamma \neq 1$  simulation. MTNO3 Henry's law coefficient was increased by 100x compared to *a priori* estimates (Table 2). Activity coefficients at infinite dilution were decreased by 10x compared to Table 2 resulting in a decrease in  $C_H^*$  of 10x. Values different from *a priori* estimates are shaded grey.

|         | $C_0^*$                  | H       | OM/OC | $\tilde{M}$ | nC | Dg                     | $V_{Lebas}$              | $\kappa$ | $C_H^*$                  | $\gamma^\infty$ |
|---------|--------------------------|---------|-------|-------------|----|------------------------|--------------------------|----------|--------------------------|-----------------|
| species | $\mu\text{g}/\text{m}^3$ | M/atm   | g/g   | g/mol       | -  | $\text{cm}^2/\text{s}$ | $\text{cm}^3/\text{mol}$ | -        | $\mu\text{g}/\text{m}^3$ | -               |
| ALK1    | 0.1472                   | 6.2E+08 | 1.56  | 225         | 12 | 0.0514                 | 280.5                    | 0.07     | 83                       | 565             |
| ALK2    | 51.8775                  | 4.5E+06 | 1.42  | 205.1       | 12 | 0.0546                 | 275.6                    | 0.06     | 10446                    | 201             |
| BNZ1    | 0.302                    | 2.1E+08 | 2.68  | 161         | 5  | 0.0642                 | 134.1                    | 0.19     | 175                      | 579             |
| BNZ2    | 111.11                   | 2.0E+06 | 2.23  | 134         | 5  | 0.0726                 | 127.5                    | 0.15     | 15476                    | 139             |
| BNZ3    | 0.01                     | NA      | 3     | 180         | 5  | 0.0596                 | 138.1                    | 0.23     | NA                       | NA              |
| DIM     | 0.01                     | NA      | 2.07  | 248.2       | 10 | 0.0481                 | 248.1                    | 0.13     | NA                       | NA              |
| GLY     | 0.01                     | NA      | 2.13  | 66.4        | 3  | 0.1159                 | 64.9                     | 0.13     | NA                       | NA              |
| IEOS    | 0.01                     | NA      | 3.6   | 216.2       | 5  | 0.0527                 | 147.8                    | 0.3      | NA                       | NA              |
| IETET   | 0.01                     | NA      | 2.27  | 136.2       | 5  | 0.0718                 | 127.1                    | 0.15     | NA                       | NA              |
| IMGA    | 0.01                     | NA      | 2.5   | 120.1       | 4  | 0.0781                 | 105                      | 0.18     | NA                       | NA              |
| IMOS    | 0.01                     | NA      | 4.17  | 200.2       | 4  | 0.0555                 | 130.3                    | 0.36     | NA                       | NA              |
| ISO1    | 116.01                   | 4.3E+07 | 2.2   | 132         | 5  | 0.0733                 | 126.3                    | 0.14     | 695                      | 6               |
| ISO2    | 0.617                    | 3.7E+09 | 2.23  | 133         | 5  | 0.0729                 | 123.8                    | 0.15     | 8                        | 13              |
| ISO3    | 0.01                     | NA      | 2.8   | 168.2       | 5  | 0.0624                 | 135.9                    | 0.21     | NA                       | NA              |
| ISOPNN  | 8.9                      | 4.5E+08 | 3.8   | 226         | 5  | 0.0512                 | 151.9                    | 0.32     | 114                      | 13              |
| MTHYD   | 0.01                     | NA      | 1.54  | 185         | 10 | 0.0585                 | 233.8                    | 0.07     | NA                       | NA              |
| MTNO3   | 12                       | 1.5E+08 | 1.9   | 231         | 10 | 0.0505                 | 248.8                    | 0.11     | 350                      | 29              |
| OLGA    | 0.01                     | NA      | 2.5   | 206         | 7  | 0.0545                 | 168.2                    | 0.18     | NA                       | NA              |
| OLGB    | 0.01                     | NA      | 2.1   | 248         | 10 | 0.0481                 | 234.8                    | 0.13     | NA                       | NA              |
| ORGC    | 0.01                     | NA      | 2     | 177         | 7  | 0.0603                 | 180.3                    | 0.12     | NA                       | NA              |
| PAH1    | 1.6598                   | 5.1E+07 | 1.63  | 195.6       | 10 | 0.0564                 | 235.7                    | 0.08     | 876                      | 528             |
| PAH2    | 264.6675                 | 7.2E+05 | 1.49  | 178.7       | 10 | 0.0599                 | 231.5                    | 0.06     | 56704                    | 214             |
| PAH3    | 0.01                     | NA      | 1.77  | 212.2       | 10 | 0.0534                 | 239.8                    | 0.09     | NA                       | NA              |
| SQT     | 24.984                   | 6.2E+08 | 1.52  | 273         | 15 | 0.0451                 | 346.5                    | 0.07     | 100                      | 4               |
| TOL1    | 2.326                    | 4.2E+07 | 2.26  | 163         | 6  | 0.0637                 | 153.7                    | 0.15     | 888                      | 382             |
| TOL2    | 21.277                   | 7.3E+06 | 1.82  | 175         | 8  | 0.0607                 | 194.1                    | 0.1      | 5477                     | 257             |
| TOL3    | 0.01                     | NA      | 2.7   | 194         | 6  | 0.0567                 | 159                      | 0.2      | NA                       | NA              |
| TRP1    | 14.792                   | 9.9E+08 | 1.84  | 177         | 8  | 0.0603                 | 194.9                    | 0.1      | 41                       | 3               |
| TRP2    | 133.7297                 | 1.4E+08 | 1.83  | 198         | 9  | 0.0559                 | 218.8                    | 0.1      | 329                      | 2               |
| XYL1    | 1.314                    | 6.2E+07 | 2.42  | 174         | 6  | 0.061                  | 154.6                    | 0.17     | 641                      | 488             |
| XYL2    | 34.483                   | 4.0E+06 | 1.93  | 185         | 8  | 0.0585                 | 194.6                    | 0.11     | 10597                    | 307             |
| XYL3    | 0.01                     | NA      | 2.3   | 218         | 8  | 0.0525                 | 194.1                    | 0.15     | NA                       | NA              |

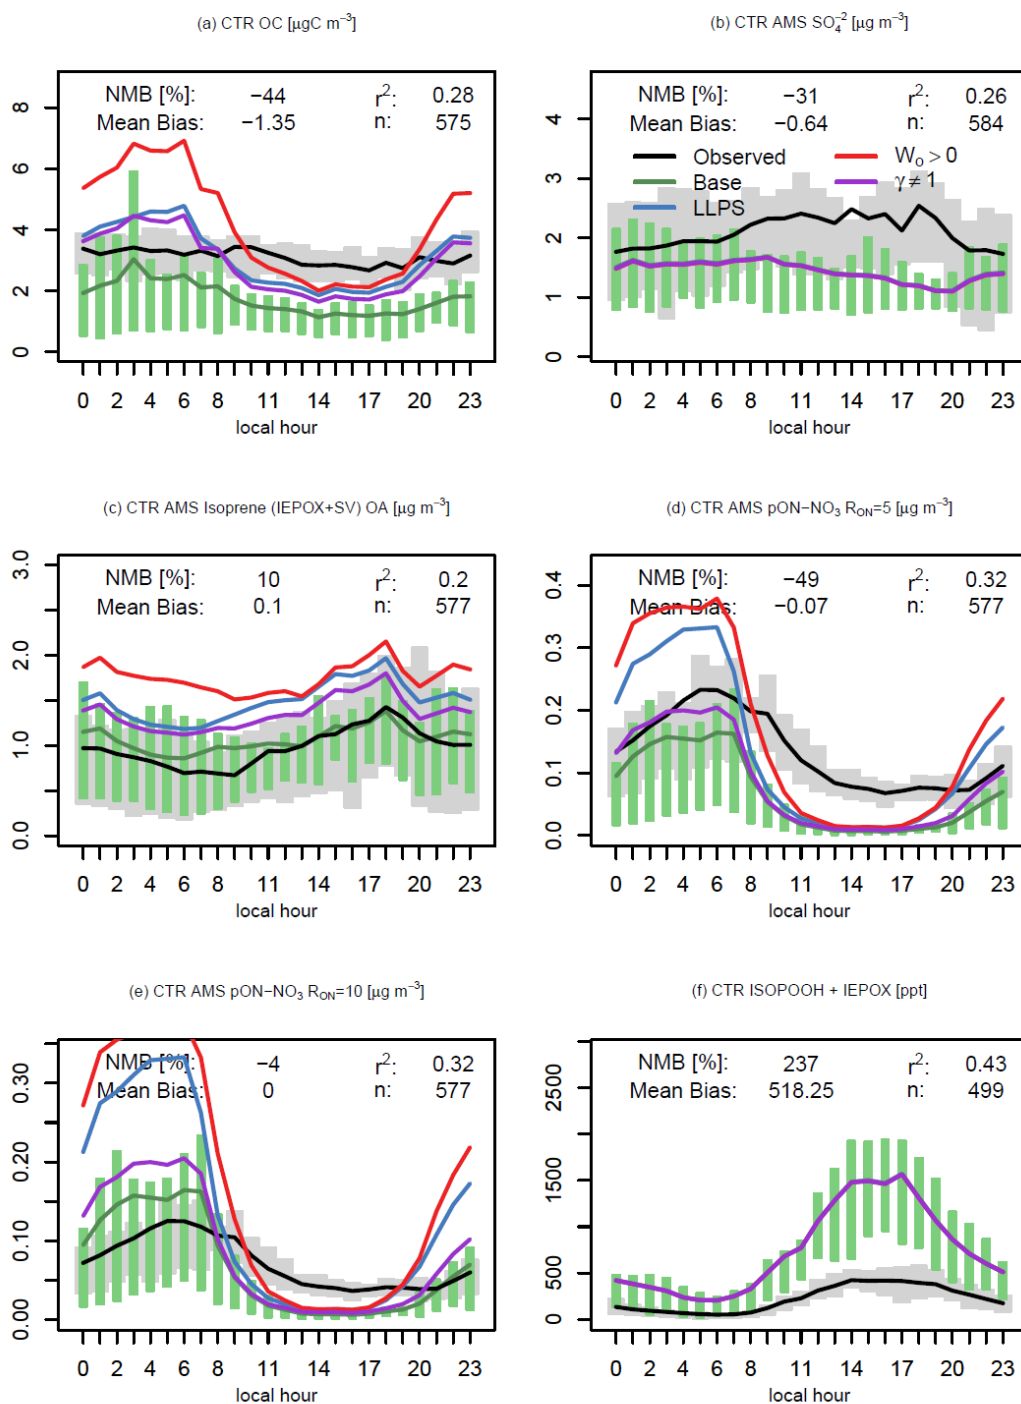

Figure S1: Diurnal variation in modeled and observed species during SOAS. CTR AMS data is from Georgia Tech (Xu et al., 2015). CTR ISOPOOH+IEPOX data is from the CIT-ToF-CIMS (Nguyen et al., 2015). CTR particle-phase tetrol data is from the SV-TAG instrument (Isaacman et al. 2014). Isoprene is from the PTR-MS (Miszta et al. in preparation). OH is from the GTHOS (Feiner et al., 2016). LRK AMS data is from Budisulistiorini et al. (2015). Mean bias, normalized mean bias (NMB), and  $r^2$  refer to the base simulation and observations. Colored lines represent different model simulation predictions. Vertical bars represent interquartile range.

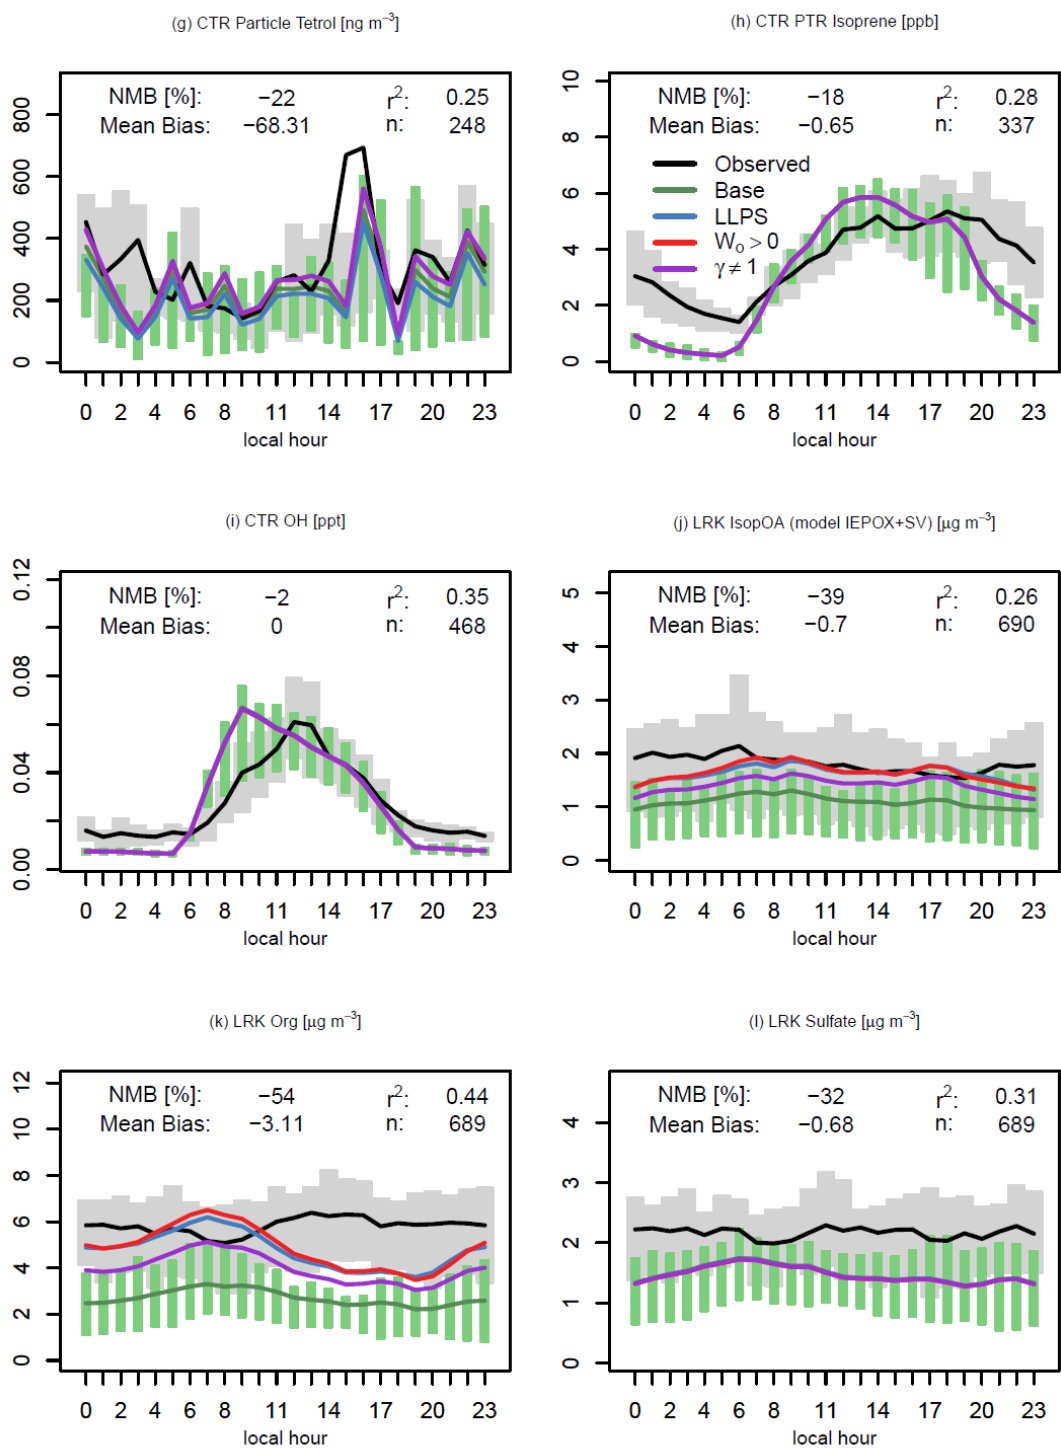

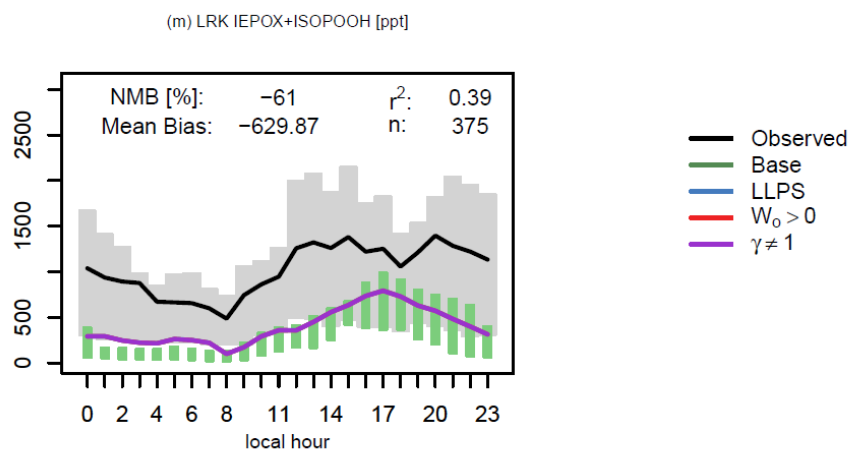

91  
92 Figure S1 continued



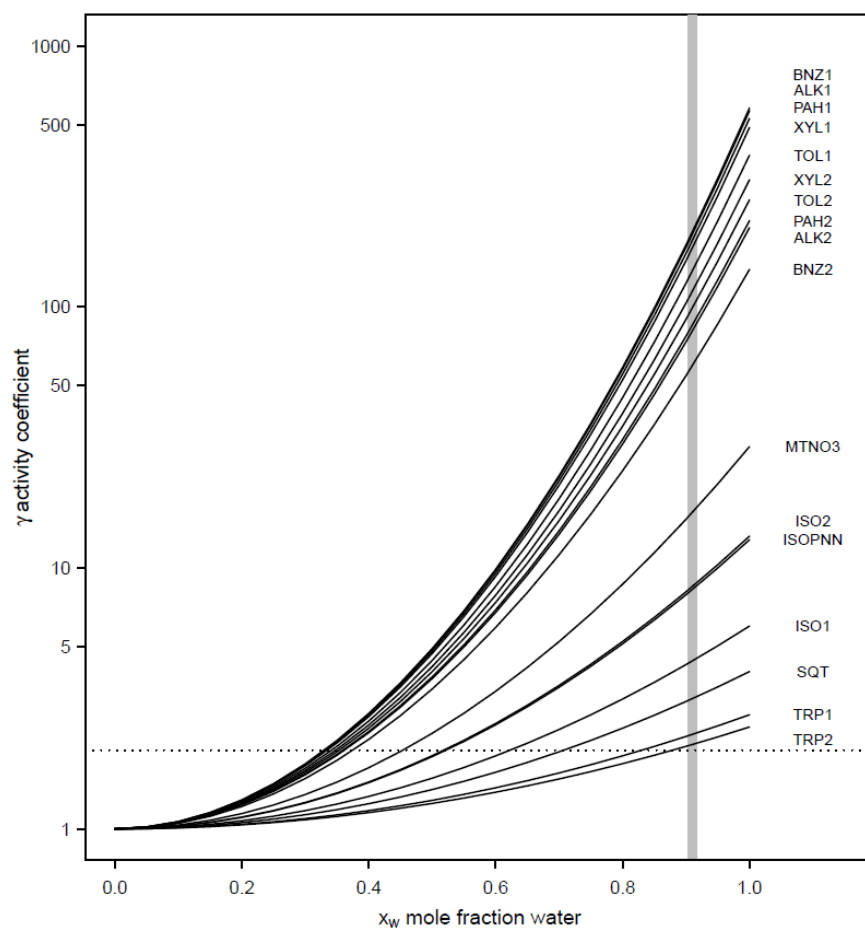

Figure S2: Activity coefficients ( $\gamma \neq 1$  simulation) for semivolatile organics as a function of mole fraction water in the particle at 298 K. Dotted line indicates  $\gamma = 2$  which would result in a factor of 2 increase in the saturation concentration. The vertical grey line indicates the average mole fraction of water in the particle estimated from SOAS observations (0.91). The MTNO3 Henry's law coefficient has been increased by a factor of 100 compared to *a priori* assumptions. Activity coefficients at infinite dilution ( $x_w = 1$ ) have been reduced by a factor of 10 compared to *a priori* assumptions.

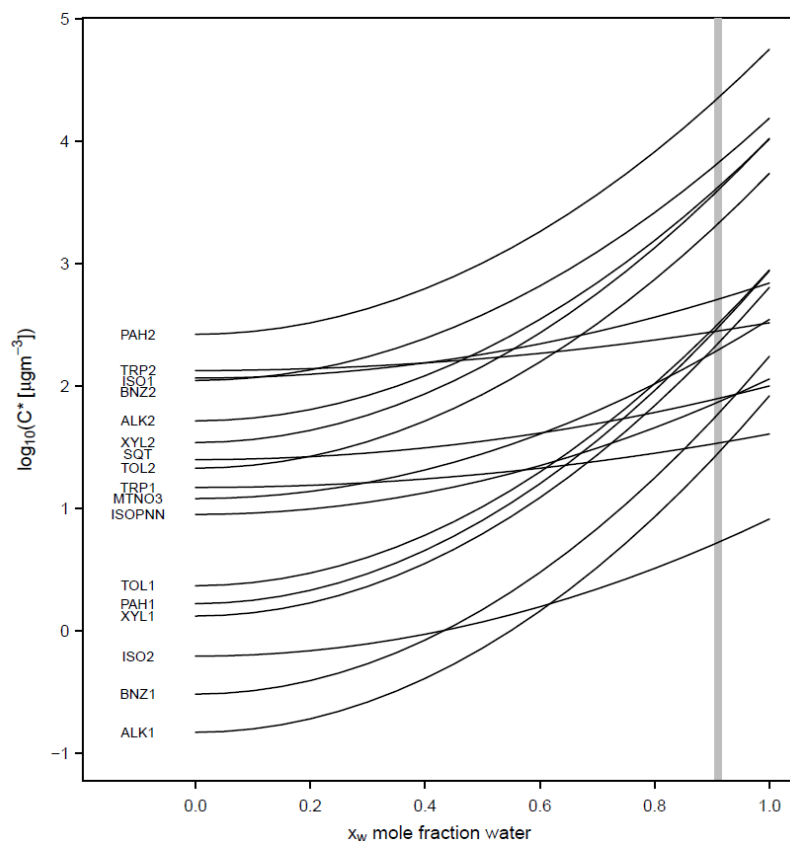

Figure S3: Saturation concentration ( $C^*_i$ ) as a function of aerosol water mole fraction at 298 K. The vertical grey line indicates the average mole fraction of water in the particle estimated from SOAS observations (0.91). The MTNO3 Henry's law coefficient has been increased by a factor of 100 compared to *a priori* assumptions. Activity coefficients at infinite dilution ( $x_w = 1$ ) have been reduced by a factor of 10 compared to *a priori* assumptions.

## REFERENCES

- Budisulistiorini, S. H., Li, X., Bairai, S. T., Renfro, J., Liu, Y., Liu, Y. J., McKinney, K. A., Martin, S. T., McNeill, V. F., Pye, H. O. T., Nenes, A., Neff, M. E., Stone, E. A., Mueller, S., Knote, C., Shaw, S. L., Zhang, Z., Gold, A., and Surratt, J. D.: Examining the effects of anthropogenic emissions on isoprene-derived secondary organic aerosol formation during the 2013 Southern Oxidant and Aerosol Study (SOAS) at the Look Rock, Tennessee ground site, *Atmos. Chem. Phys.*, 15, 8871–8888, doi:10.5194/acp-15-8871-2015, 2015.
- Canagaratna, M. R., Jimenez, J. L., Kroll, J. H., Chen, Q., Kessler, S. H., Massoli, P., Hildebrandt Ruiz, L., Fortner, E., Williams, L. R., Wilson, K. R., Surratt, J. D., Donahue, N.M., Jayne, J. T., and Worsnop, D. R.: Elemental ratio measurements of organic compounds using aerosol mass spectrometry: characterization, improved calibration, and implications, *Atmos. Chem. Phys.*, 15, 253–272, doi:10.5194/acp-15-253-2015, 2015.
- Duplissy, J., DeCarlo, P. F., Dommen, J., Alfarra, M. R., Metzger, A., Barmapadimos, I., Prevot, A. S. H., Weingartner, E., Tritscher, T., Gysel, M., Aiken, A. C., Jimenez, J. L., Canagaratna, M. R., Worsnop, D. R., Collins, D. R., Tomlinson, J., and Baltensperger, U.: Relating hygroscopicity and composition of organic aerosol particulate matter, *Atmos. Chem. Phys.*, 11, 1155–1165, doi:10.5194/acp-11-1155-2011, 2011.
- Feiner, P. A. W. H. Brune, D. O. Miller, L. Zhang, R. C. Cohen, P. S. Romer, A. H. Goldstein, F. N. Keutsch, K. M. Skog, P. O. Wennberg, T. Nguyen, A. P. Teng, J. DeGouw, A. Koss, R. J. Wild, S. S. Brown, A. Guenther, E. Edgerton, K. Baumann, J. L. Fry, Testing atmospheric oxidation in an Alabama forest, submitted to *J. Atmos. Sci.*
- Isaacman, G., N.M. Kreisberg, L.D. Yee, D.R. Worton, A.W.H. Chan, J.A. Moss, S.V. Hering, and A.H. Goldstein, Online derivatization for hourly measurements of gas- and particle-phase semi-volatile oxygenated organic compounds by thermal desorption aerosol gas chromatography (SV-TAG), *Atmos. Meas. Tech.*, 7, 4417–4429, doi:10.5194/amt-7-4417-2014, 2014.
- Jimenez, J. L., Canagaratna, M. R., Donahue, N. M., Prevot, A. S. H., Zhang, Q., Kroll, J. H., DeCarlo, P. F., Allan, J. D., Coe, H., Ng, N. L., Aiken, A. C., Docherty, K. S., Ulbrich, I. M., Grieshop, A. P., Robinson, A. L., Duplissy, J., Smith, J. D., Wilson, K. R., Lanz, V. A., Hueglin, C., Sun, Y. L., Tian, J., Laaksonen, A., Raatikainen, T., Rautiainen, J., Vaattovaara, P., Ehn, M., Kulmala, M., Tomlinson, J. M., Collins, D. R., Cubison, M. J., Dunlea, J., Huffman, J. A., Onasch, T. B., Alfarra, M. R., Williams, P. I., Bower, K., Kondo, Y., Schneider, J., Drewnick, F., Borrmann, S., Weimer, S., Demerjian, K., Salcedo, D., Cottrell, L., Griffin, R., Takami, A., Miyoshi, T., Hatakeyama, S., Shimono, A., Sun, J. Y., Zhang, Y. M., Dzepina, K., Kimmel, J. R., Sueper, D., Jayne, J. T., Herndon, S. C., Trimborn, A. M., Williams, L. R., Wood, E. C., Middlebrook, A. M., Kolb, C. E., Baltensperger, U., and Worsnop, D. R.: Evolution of Organic Aerosols in the Atmosphere, *Science*, 326, 1525–1529, doi:10.1126/science.1180353, 2009.
- Lambe, A. T., Onasch, T. B., Massoli, P., Croasdale, D. R., Wright, J. P., Ahern, A. T., Williams, L. R., Worsnop, D. R., Brune, W. H., and Davidovits, P.: Laboratory studies of the chemical composition and cloud condensation nuclei (CCN) activity of secondary organic aerosol (SOA) and oxidized primary organic aerosol (OPOA), *Atmos. Chem. Phys.*, 11, 8913–8928, doi:10.5194/acp-11-8913-2011, 2011.
- Misztal, P. K., Guenther, A., and Goldstein, A. H.: Flux observations of isoprene oxidation products above forests point to potential role of leaf-surface reactions, in preparation, 2016.

158 Nguyen, T. B., Crounse, J. D., Teng, A. P., St. Clair, J. M., Paulot, F., Wolfe, G. M., and Wennberg, P.  
 159 O.: Rapid deposition of oxidized biogenic compounds to a temperate forest, *Proc. Natl. Acad. Sci. U. S.*  
 160 *A.*, 112, E392–E401, doi:10.1073/pnas.1418702112, 2015.  
 161  
 162 Raatikainen, T., Vaattovaara, P., Tiitta, P., Miettinen, P., Rautiainen, J., Ehn, M., Kulmala, M.,  
 163 Laaksonen, A., and Worsnop, D. R.: Physicochemical properties and origin of organic groups detected in  
 164 boreal forest using an aerosol mass spectrometer, *Atmos. Chem. Phys.*, 10, 2063–2077, doi:10.5194/acp-  
 165 10-2063-2010, 2010.  
 166  
 167 Sander R.: Compilation of Henry’s Law Constants for Inorganic and Organic Species of Potential  
 168 Importance in Environmental Chemistry (Max Planck Inst Chem, Mainz, Germany). [http://www.henrys-](http://www.henrys-law.org/henry-3.0.pdf)  
 169 [law.org/henry-3.0.pdf](http://www.henrys-law.org/henry-3.0.pdf), 1999.  
 170  
 171 Simon, H. and Bhawe, P. V.: Simulating the degree of oxidation in atmospheric organic particles,  
 172 *Environ. Sci. Technol.*, 46, 331–9, 2012.  
 173  
 174 You, Y., Renbaum-Wolff, L., and Bertram, A. K.: Liquid-liquid phase separation in particles containing  
 175 organics mixed with ammonium sulfate, ammonium bisulfate, ammonium nitrate or sodium chloride,  
 176 *Atmos. Chem. Phys.*, 13, 11 723–11 734, doi:10.5194/acp-13-11723-2013, 2013.  
 177  
 178 Wolfe, G. M., and Thornton, J. A.: The Chemistry of Atmosphere-Forest Exchange (CAFE) Model – Part  
 179 1: Model description and characterization. *Atmos. Chem. Phys.* 11, 1, 77-101, 2011.  
 180  
 181 Xu, L., Guo, H., Boyd, C. M., Klein, M., Bougiatioti, A., Cerully, K. M., Hite, J. R., Isaacman-VanWertz,  
 182 G., Kreisberg, N. M., Knote, C., Olson, K., Koss, A., Goldstein, A. H., Hering, S. V., de Gouw, J.,  
 183 Baumann, K., Lee, S.-H., Nenes, A., Weber, R. J., and Ng, N. L.: Effects of anthropogenic emissions on  
 184 aerosol formation from isoprene and monoterpenes in the southeastern United States, *Proc. Natl. Acad.*  
 185 *Sci. U. S. A.*, 112, 37–42, doi:10.1073/pnas.1417609112, 2015.
