# Supplementary material for: On the implications of aerosol liquid water and phase separation for organic aerosol mass
Source: Copernicus journal article supplement (doi:10.5194/acp-17-343-2017), 2017-01-06
Supplement: Supplementary file 2 [file acp-17-343-2017-supplement.zip]

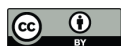

## Supplement of

# On the implications of aerosol liquid water and phase separation for organic aerosol mass

Havala O. T. Pye et al.

Correspondence to: Havala O. T. Pye (pye.havala@epa.gov)

- acp-17-343-2017-supplement-title-page.pdf
- acp-2016-719-supplement-version4.pdf
- acpdata
  - README.txt
  - figure11
    - \* S-A09\_SOASsvdma\_20130715\_R0-Waterdata.OUT.0526hlawuporgwater.csv
    - \* S-A09\_SOASsvdma\_20130715\_R0-Waterdata.OUT.0531base.csv
    - \* S-A09\_SOASsvdma\_20130715\_R0-Waterdata.OUT.0531lle.csv
    - \* S-A09\_SOASsvdma\_20130715\_R0-Waterdata.OUT.0616act.csv
    - \* S-A10-fRHwater\_CTR\_20130601\_RA.OUT.0526hlawuporgwater.csv
    - \* S-A10-fRHwater\_CTR\_20130601\_RA.OUT.0531base.csv
    - \* S-A10-fRHwater\_CTR\_20130601\_RA.OUT.0531lle.csv
    - \* S-A10-fRHwater\_CTR\_20130601\_RA.OUT.0616act.csv
    - \* S-A18-AMSMassElementalRatio\_CTR\_20130606\_RB.OUT.0526hlawuporgwater.csv
    - \* S-A18-AMSMassElementalRatio\_CTR\_20130606\_RB.OUT.0531base.csv
    - \* S-A18-AMSMassElementalRatio\_CTR\_20130606\_RB.OUT.0531lle.csv
    - \* S-A18-AMSMassElementalRatio\_CTR\_20130606\_RB.OUT.0616act.csv
  - figure13
    - \* S-A10-WSOC\_CTR\_20130601\_RA.OUT.0531base.WSOC.csv
    - \* S-A10-WSOC\_CTR\_20130601\_RA.OUT.0616act.WSOC.csv
  - figure14
    - \* WSOCg.OUT.0526hlawuporgwater.csv
    - \* WSOCg.OUT.0531base.csv
    - \* WSOCg.OUT.0531lle.csv
    - \* WSOCg.OUT.0616act.csv
  - figure6

- \* ACSM\_LRK\_20130601\_R0.OUT.0531base.csv
  - \* PMF\_LRK\_20130601\_R0.OUT.0531base.csv
  - \* S-A15-HRAMS-ambientPMF\_CTR\_20130601\_R0.OUT.0531base.csv
  - \* S-A15-HRAMS-ambient\_CTR\_20130601\_R0.OUT.0531base.csv
- figure789
- \* CSN.OUT.0526hlawuporgwater.csv
  - \* CSN.OUT.0531base.csv
  - \* CSN.OUT.0531lle.csv
  - \* CSN.OUT.0616act.csv
  - \* IMPROVE.OUT.0526hlawuporgwater.csv
  - \* IMPROVE.OUT.0531base.csv
  - \* IMPROVE.OUT.0531lle.csv
  - \* IMPROVE.OUT.0616act.csv
  - \* SEARCH.OUT.0526hlawuporgwater.csv
  - \* SEARCH.OUT.0531base.csv
  - \* SEARCH.OUT.0531lle.csv
  - \* SEARCH.OUT.0616act.csv

The copyright of individual parts of the supplement might differ from the CC-BY 3.0 licence.
